# Supplementary material
Source: publisher figshare collection journal article supplement (https://acs.figshare.com/ndownloader/files/3730003)
Supplement: Supplementary file 1 [file 3730003]

Supporting Information for

# Mechanism of Alcohol Oxidation by $\text{Fe}^{\text{V}}(\text{O})$ at Room Temperature

*Munmun Ghosh<sup>‡,a</sup>, YLK Nikhil<sup>‡,a</sup>, Basab B. Dhar,<sup>b</sup> and Sayam Sen Gupta<sup>a\*</sup>*

<sup>a</sup> Chemical Engineering Division, CSIR-National Chemical Laboratory, Pune 411008, India;

<sup>b</sup> Department of chemistry, Shiv Nadar University, Gautam Budha Nagar, UP, 201314, India;

<sup>‡</sup>Indicates equal contribution

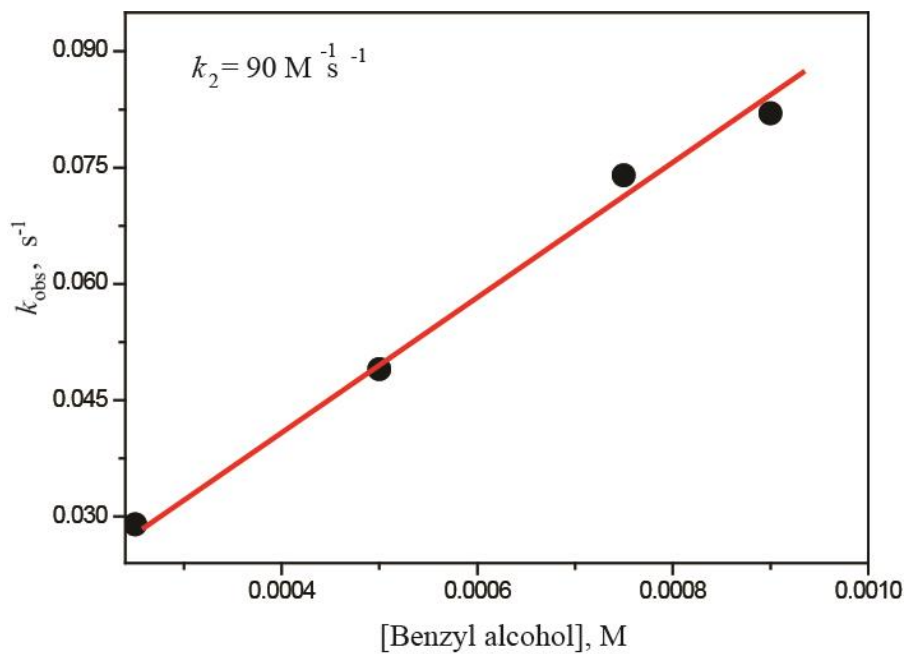

**Figure SI 1** Plot of  $k_{\text{obs}}$  against the concentration of benzyl alcohol to determine the second-order rate constant

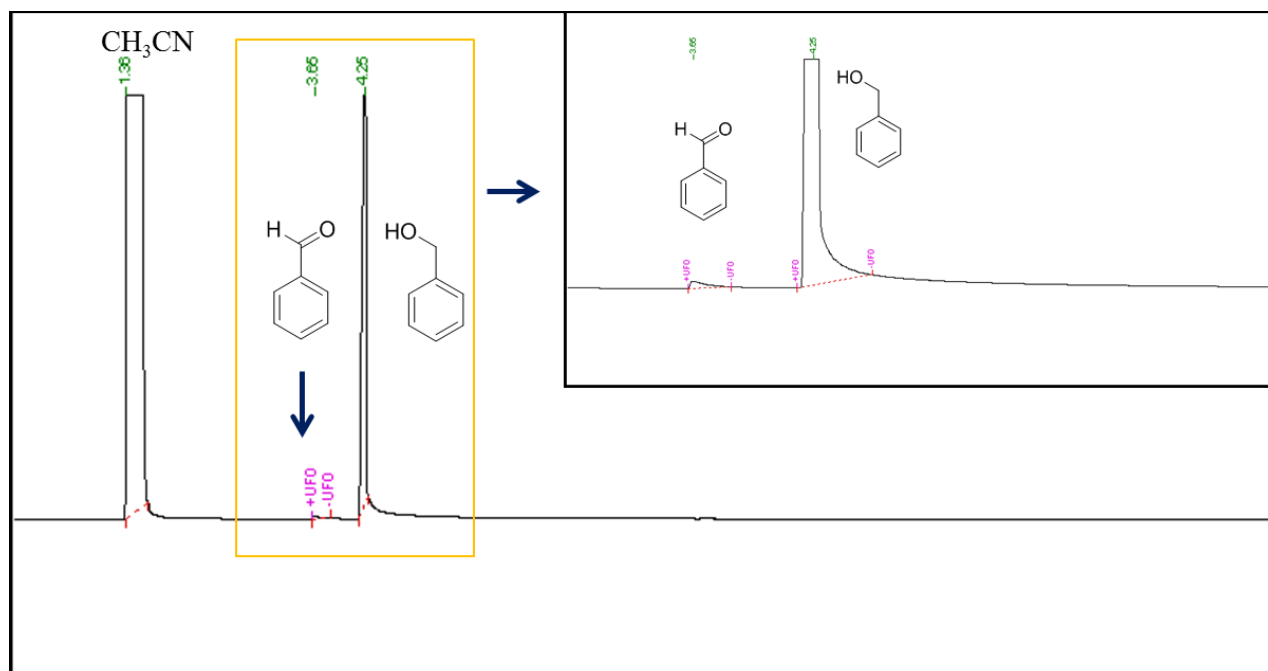

**Figure SI 2** GC chromatogram of reaction with 500 equiv benzyl alcohol with  $\text{Fe}^{\text{V}}(\text{O})$  ( $5 \times 10^{-5}$  M) benzaldehyde  $R_t = 3.6$  and benzyl alcohol  $R_t = 4.25$

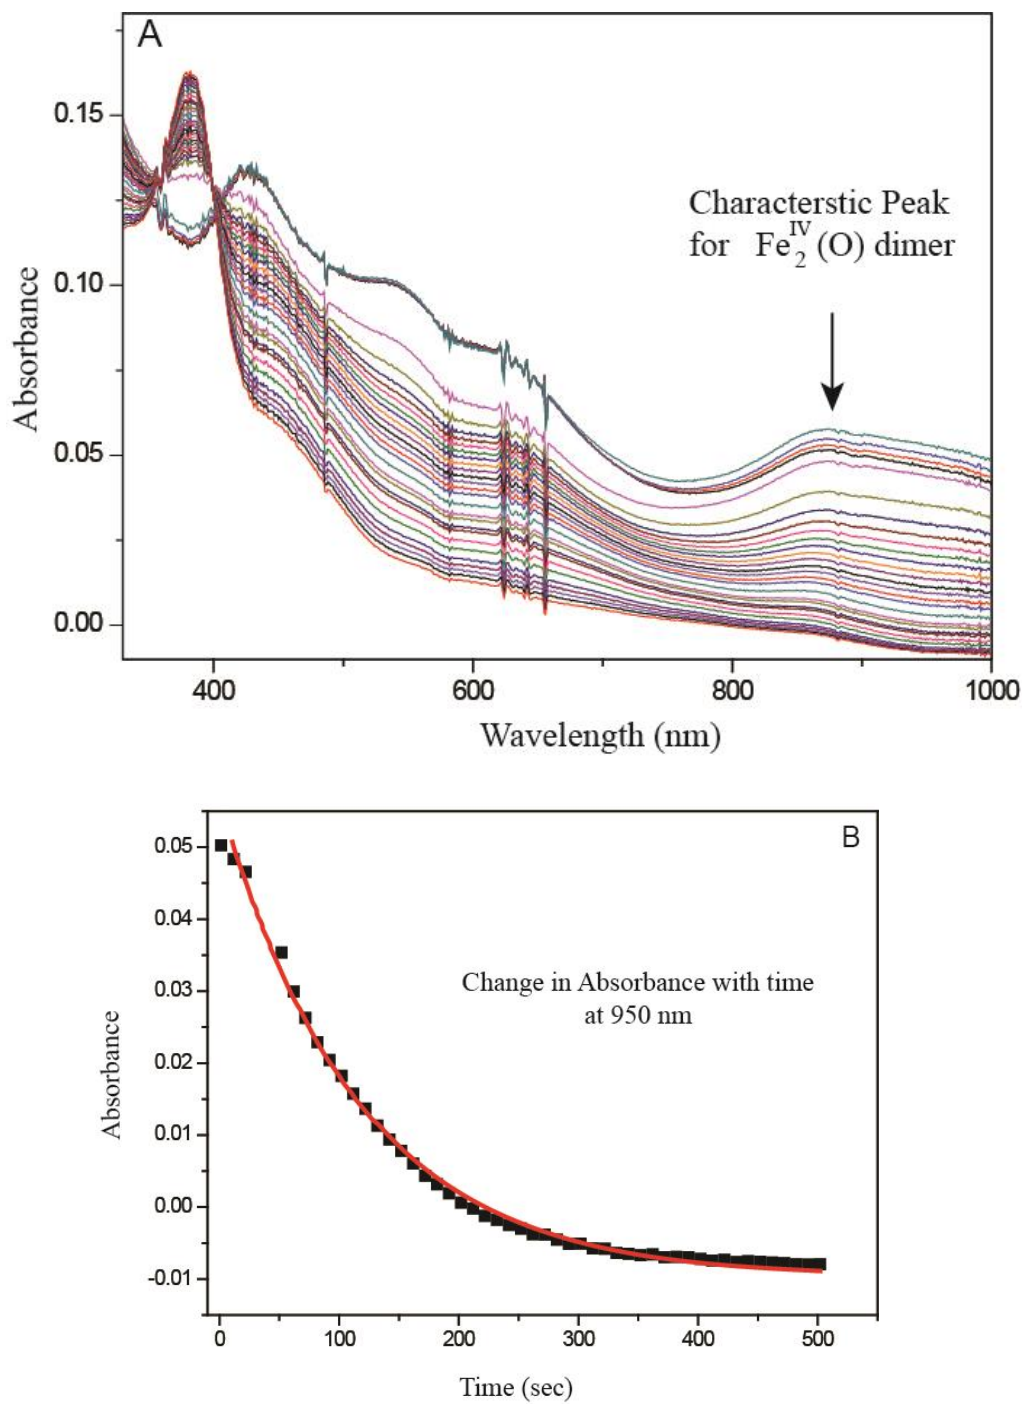

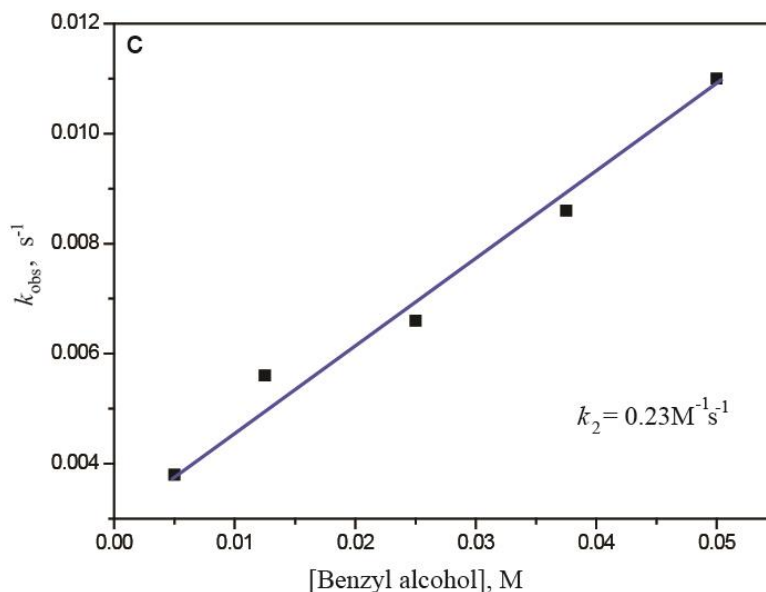

**Figure SI 3** (A) Uv-vis spectral changes upon reaction of  $\mu$ -oxo- $\text{Fe}^{\text{IV}}$  dimer ( $5 \times 10^{-5} \text{ M}$ ) with benzyl alcohol (2.5 mM). (B) Absorbance vs time plot at 950 nm for reaction of  $\mu$ -oxo- $\text{Fe}^{\text{IV}}$  dimer ( $5 \times 10^{-5} \text{ M}$ ) with benzyl alcohol (2.5 mM) to determine  $k_{\text{obs}}$ . (C) Plot of  $k_{\text{obs}}$  against the concentration of benzyl alcohol's to determine the second-order rate constant for reaction of  $\mu$ -oxo- $\text{Fe}^{\text{IV}}$  dimer ( $5 \times 10^{-5} \text{ M}$ ) with benzyl alcohol (2.5 mM).

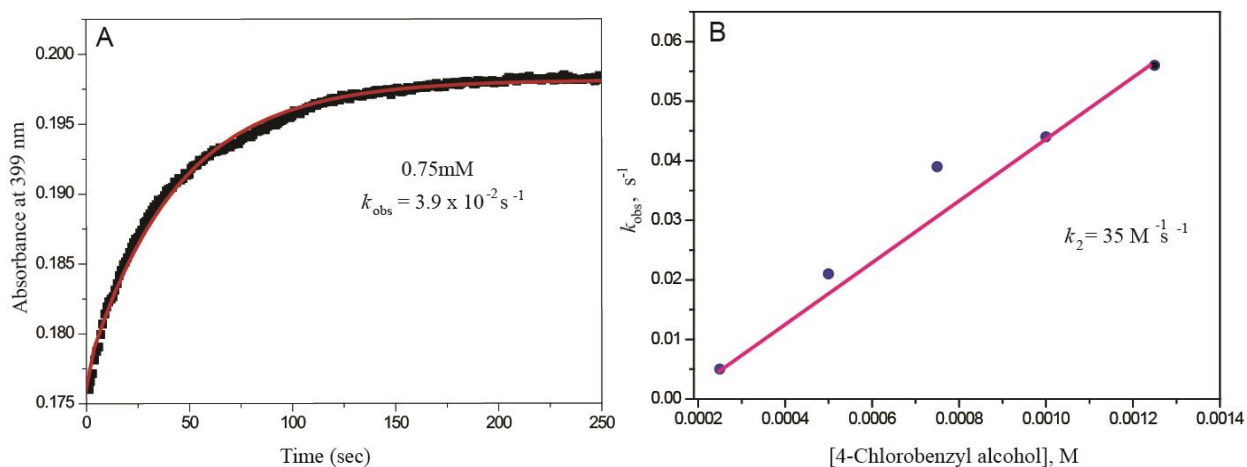

**Figure SI 4** Absorbance at 399 nm vs time to determine  $k_{\text{obs}}$  of (A) 4-Chlorobenzyl alcohol oxidation (0.75 mM, 15 equiv.) Red line is the first order fit according to the equation  $[A_t = A_\alpha - (A_\alpha - A_0)e^{-k_{\text{obs}}t}]$ . (B) Plot of  $k_{\text{obs}}$  against the concentration of 4-chloro benzyl alcohol to determine the second-order rate constant.

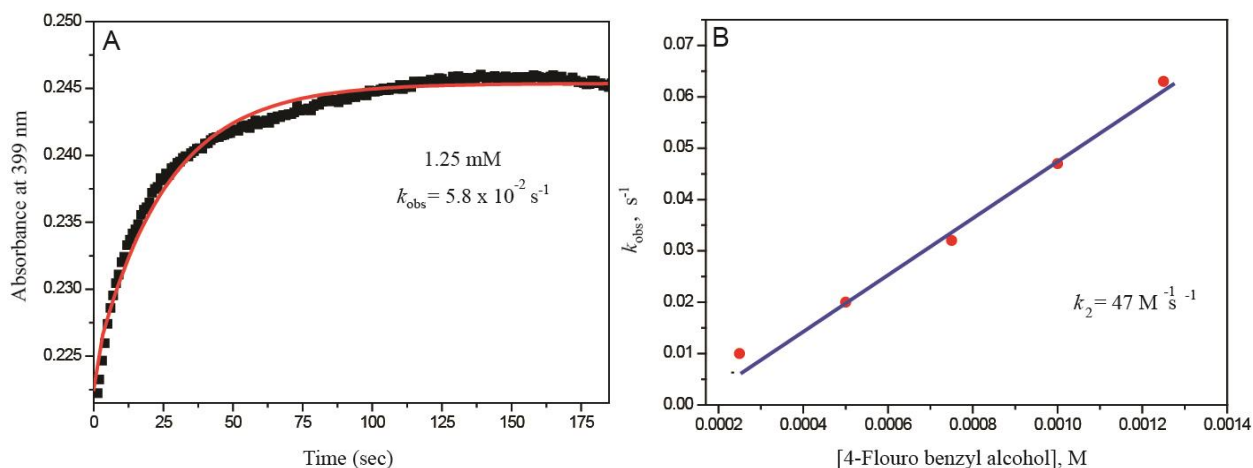

**Figure SI 5** Absorbance at 399 nm vs time to determine  $k_{\text{obs}}$  of (A) 4-Fluoro benzyl alcohol oxidation (1.25 mM, 25 equiv). Red line is the first order fit according to the equation  $[A_t = A_\alpha - (A_\alpha - A_0)e^{-k_{\text{obs}}t}]$ . (B) Plot of  $k_{\text{obs}}$  against the concentration of 4-Fluoro benzyl alcohol to determine the second-order rate constant

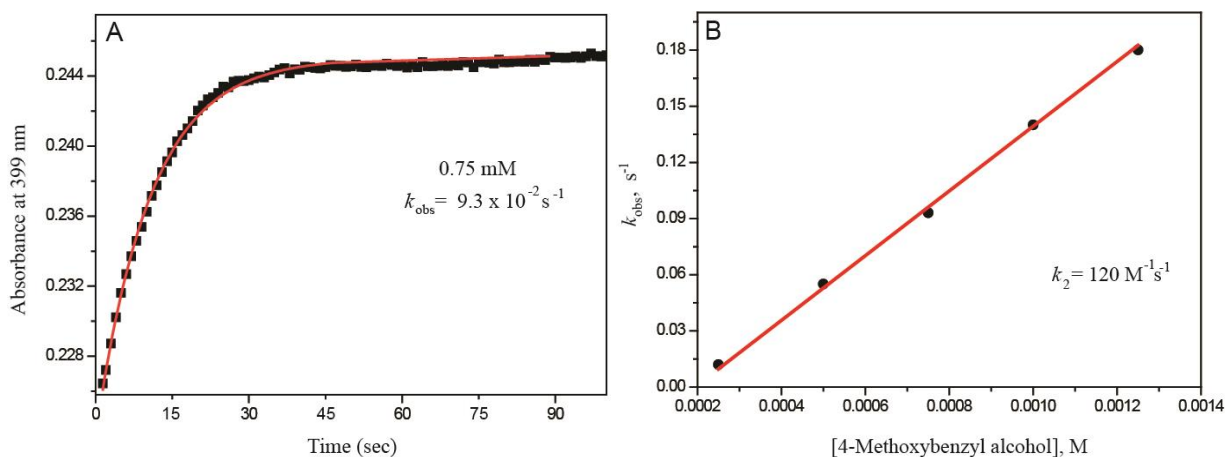

**Figure SI 6** Absorbance at 399nm vs time to determine  $k_{\text{obs}}$  of (A) 4-Methoxy benzyl alcohol oxidation (0.75 mM, 15 equiv). Red line is the first order fit according to the equation  $[A_t = A_\infty - (A_\infty - A_0)e^{-k_{\text{obs}}t}]$ . (B) Plot of  $k_{\text{obs}}$  against the concentration of 4-Methoxy benzyl alcohol's to determine the second-order rate constant.

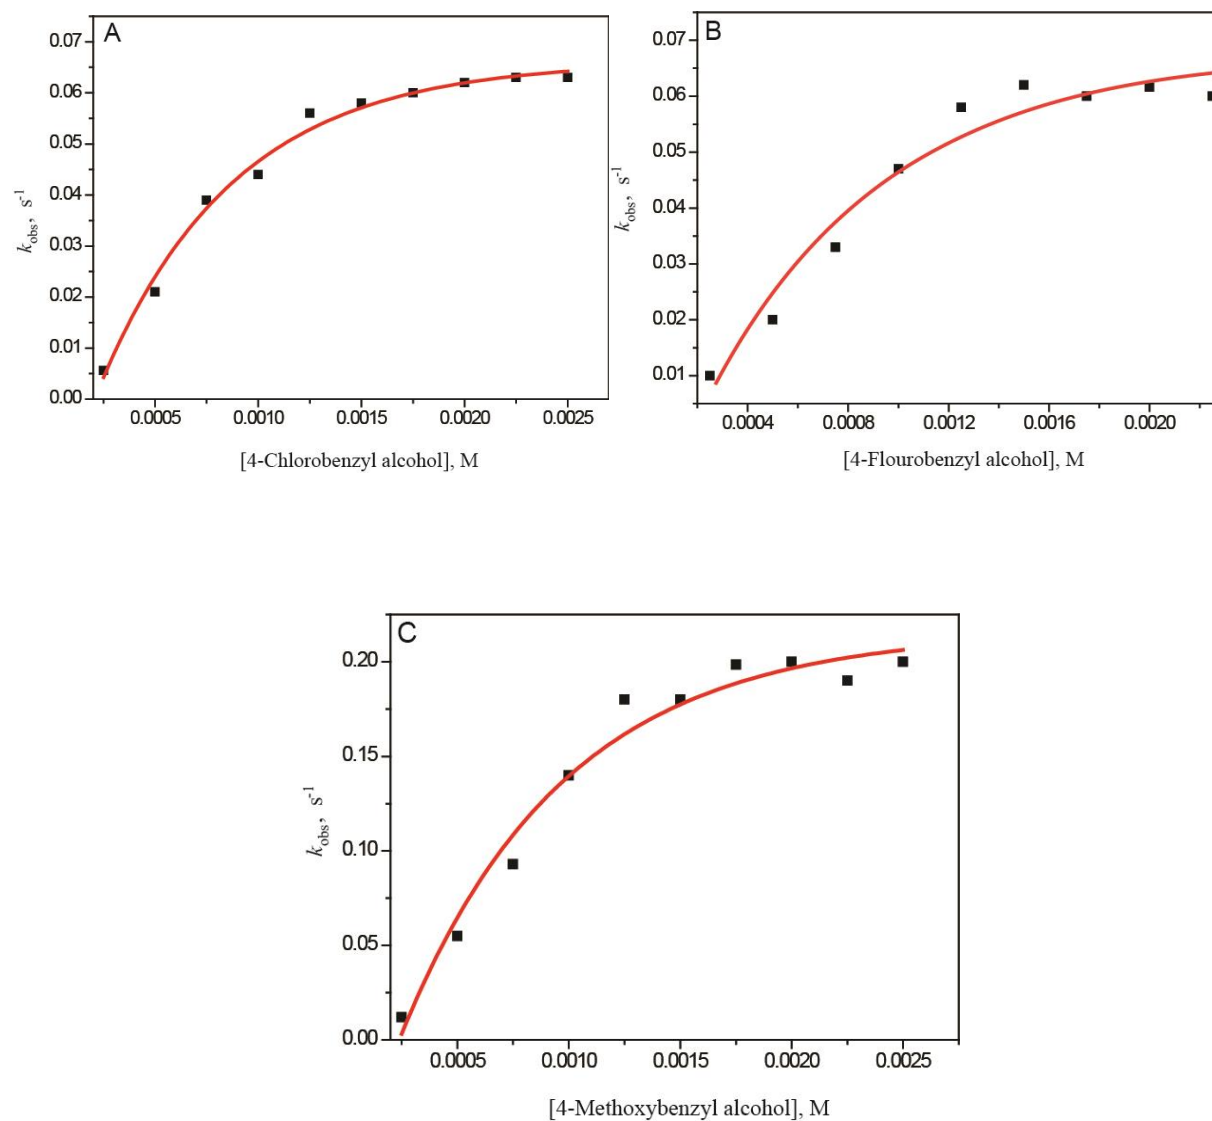

**Figure SI 7** Plot of  $k_{\text{obs}}$  vs substrate to determine the binding constant  $K$  and first order rate constant  $k$ . (A) Chlorobenzyl alcohol (B) Fluorobenzyl alcohol (C) Methoxybenzyl alcohol

| Substituents | Equilibrium constant<br>$K(\text{M}^{-1})$ | Rate constant<br>$k(\text{s}^{-1})$ | $k_2 (\text{M}^{-1}\text{s}^{-1})$<br>(experimentally determined) |
|--------------|--------------------------------------------|-------------------------------------|-------------------------------------------------------------------|
| -OMe         | $300 \pm 15$                               | $0.52 \pm 0.020$                    | $120 \pm 10$                                                      |
| -F           | $300 \pm 21$                               | $0.19 \pm 0.008$                    | $47 \pm 5$                                                        |
| -Cl          | $350 \pm 20$                               | $0.14 \pm 0.004$                    | $35 \pm 5$                                                        |

**SI Table** Equilibrium constant ( $K$ ), Rate constant ( $k$ ) and second order rate constant of substituted benzyl alcohols

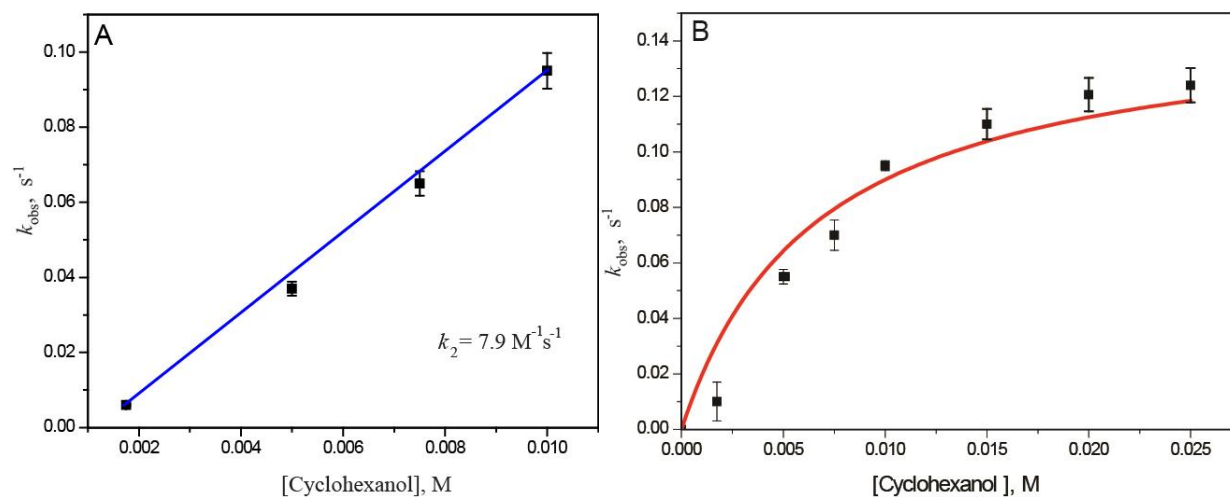

**Figure SI 8 (A)** Plot of  $k_{\text{obs}}$  against the concentration of cyclohexanol to determine the second-order rate constant. **(B)** Plot of  $k_{\text{obs}}$  vs substrate to determine the binding constant  $K$  and first order rate constant  $k$  for oxidation of cyclohexanol

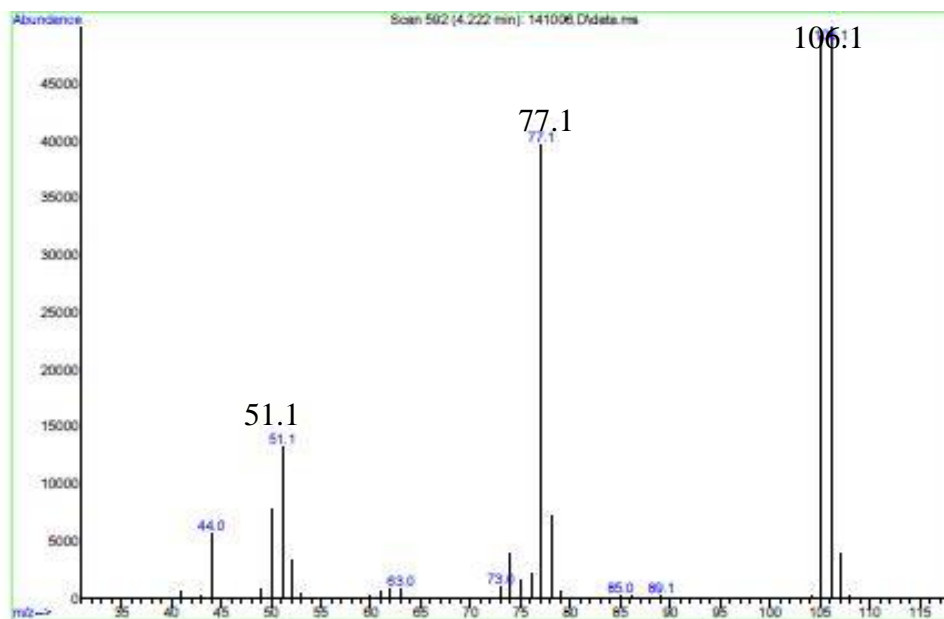

**Figure SI 9** GC-MS data for the formation of benzaldehyde product when benzyl alcohol oxidation was carried out with  $\text{Fe}^{\text{V}}(^{16}\text{O})$ .

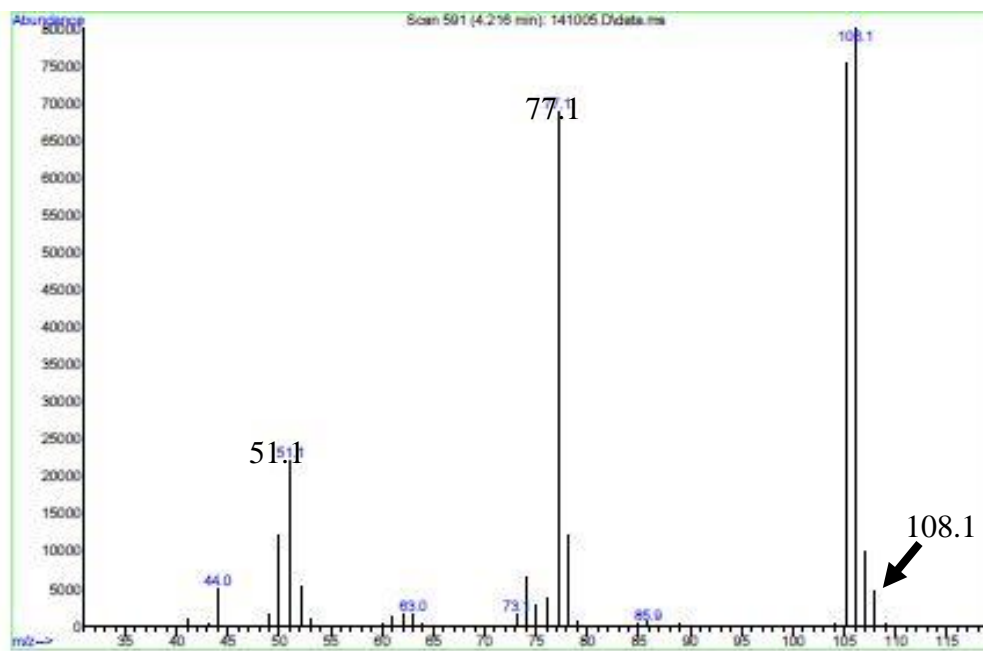

**Figure SI 10** GC-MS data showing <5% incorporation of  $^{18}\text{O}$  in benzaldehyde product when benzyl alcohol oxidation was carried out with  $\text{Fe}^{\text{V}}(^{18}\text{O})$ .

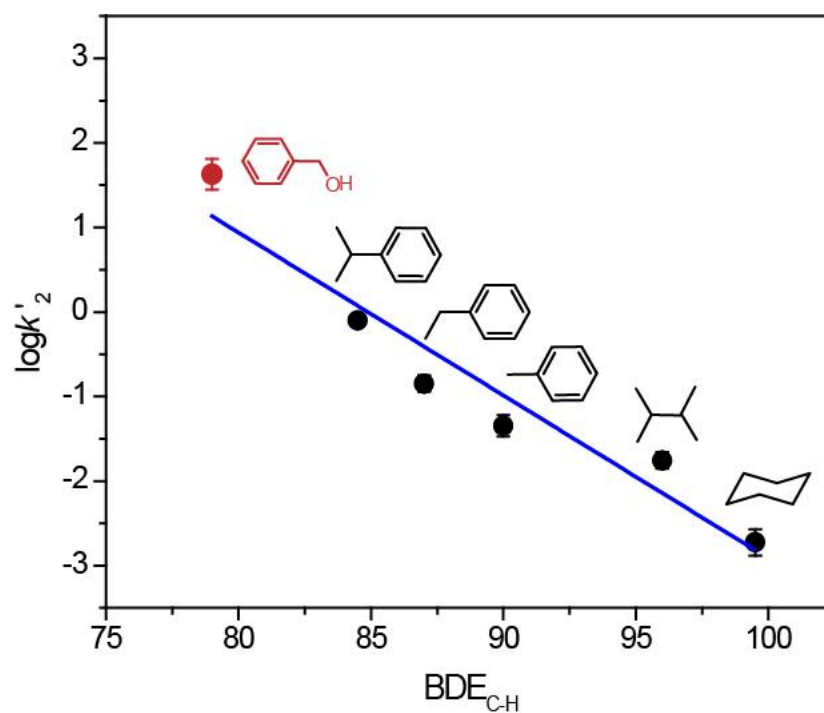

**Figure SI 11**  $\log k'_2$  vs  $\text{BDE}_{\text{C-H}}$  of various hydrocarbons for the reaction with  $\text{Fe}^{\text{V}}(\text{O})$ . The substrates represented with black circles have been published earlier by us.<sup>21</sup> Benzyl alcohol (this work) is represented with a red circle.
